# Supplementary material
Source: PubMed Central journal article supplement (PMC10061223)
Supplement: NIHMS1882787-supplement-Supplemental.pdf [file NIHMS1882787-supplement-Supplemental.pdf]

## **Inhibition of endoplasmic reticulum stress signaling rescues cytotoxicity of human *APOL1* risk variants in *Drosophila*.**

Lea Gerstner et al.

### **Supplemental Information**

- **Supplemental Figure 1. APOL1 variants are equally expressed in *Drosophila* and stainings of slit diaphragm upon APOL1 variant expression.**
- **Supplemental Figure 2. Expression of APOL1 variants via dKlf15-GAL4 in adult nephrocytes.**
- **Supplemental Figure 3. Expression of G2-APOL1 does not affect early/late endosomes and APOL1 transgenes do not overlap with Rab5.**
- **Supplemental Figure 4. APOL1 variants do not localize to late endosomes.**
- **Supplemental Figure 5. APOL1 variants localize in the endoplasmic reticulum in *Drosophila* nephrocytes.**
- **Supplemental Figure 6. Untagged  $\Delta$ BH3-APOL1, G0-APOL1 and G2-APOL1 colocalize with the ER marker calnexin.**
- **Supplemental Figure 7. Overview ER stress signaling.**
- **Supplemental Figure 8. Adult wing phenotypes upon expression of APOL1 variants.**
- **Supplemental Figure 9: G2-APOL1-dependent ER stress precedes apoptosis.**
- **Supplemental Figure 10: G2-APOL1 induces apoptosis after expression for 48 h.**
- **Supplemental Table 1. Fly stocks.**
- **Supplemental Table 2. Primer sequences.**
- **Supplemental Table 3. Antibodies.**

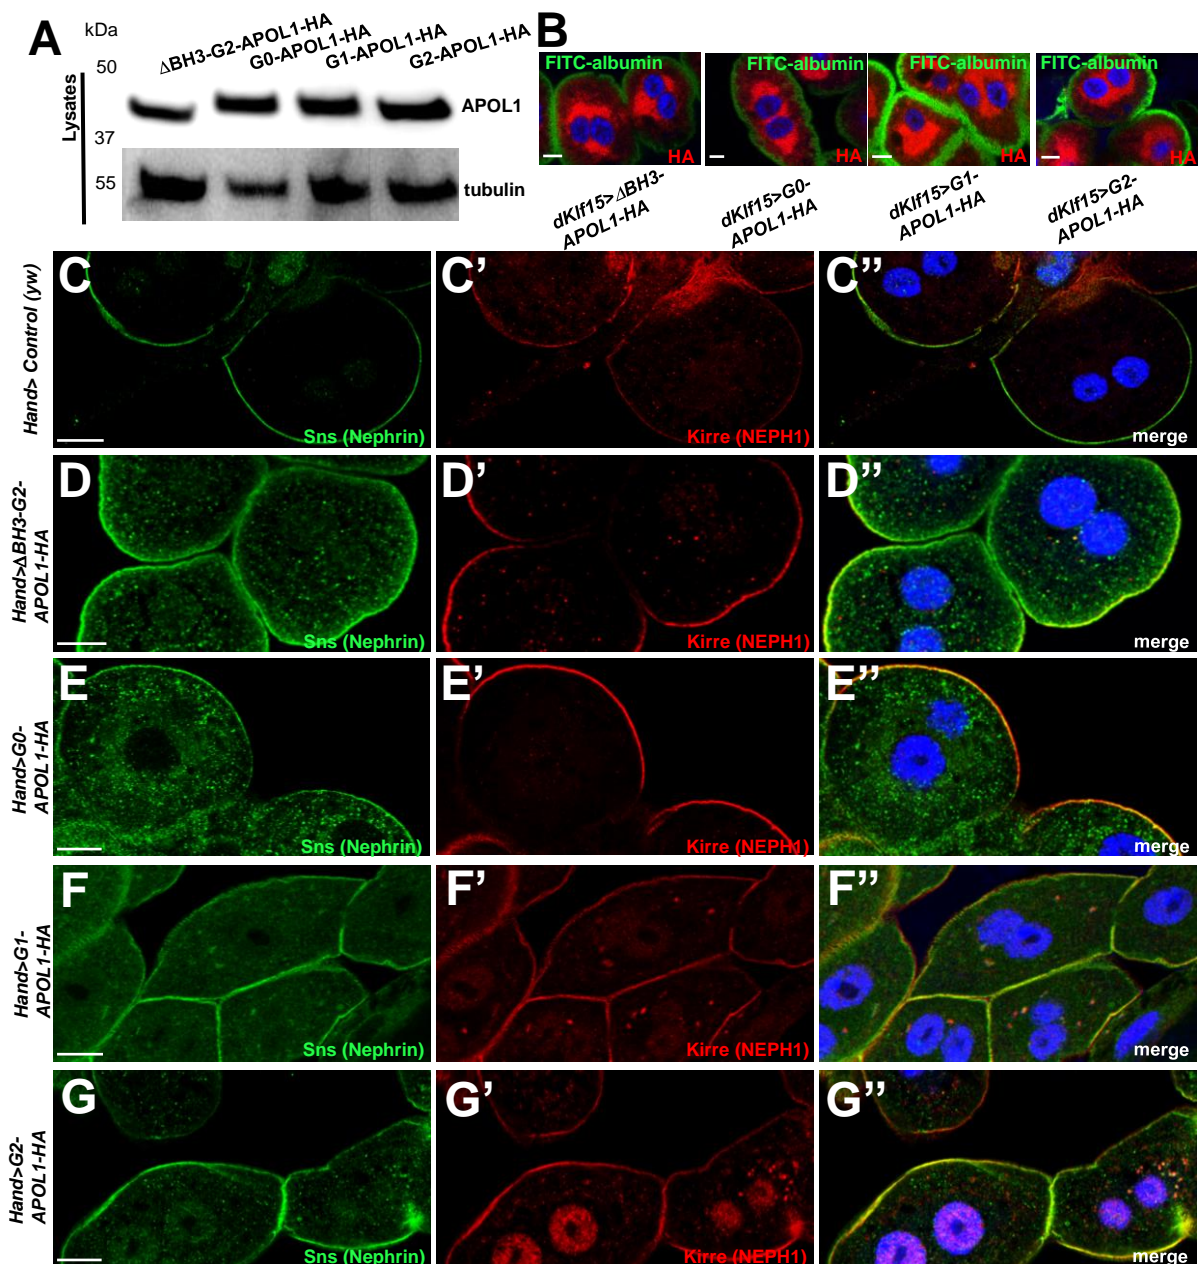

**Supplemental Figure 1: APOL1 variants are equally expressed in *Drosophila* and stainings of slit diaphragm upon APOL1 variant expression.**

**(A)** Immunoblotting after dissection of wing imaginal discs following acute APOL1 variant induction confirms equal expression of APOL1 variants (shown through HA staining), tubulin serves as loading control. All flies were raised at 29 °C.

**(B)** *Drosophila* garland cell nephrocytes expressing the indicated APOL1 variants under control of *dKif15-GAL4* are exposed to the FITC-albumin assay followed by HA-staining. FITC-albumin uptake is increased for the risk variants under transgene expression at comparable levels. Scale bar represents 10  $\mu$ m throughout the figure unless otherwise indicated.

**(C-C'')** Equatorial cross sections of control garland cell nephrocytes shows a regular staining pattern. **(D-G'')** Equatorial cross sections of garland cell nephrocytes expressing  $\Delta$ BH3-G2-APOL1 (D-D'') and nephrocytes expressing G0-APOL1 (E-E''), G1-APOL1 (F-F''), or G2-APOL1 (G-G''), using *Hand-GAL4* at 29 °C are shown. Cells are co-stained for the nephrin ortholog Sns (green) and the KIRREL/NEPH1 ortholog Kirre (red) revealing an unaffected staining pattern of slit diaphragm proteins for all indicated genotypes.

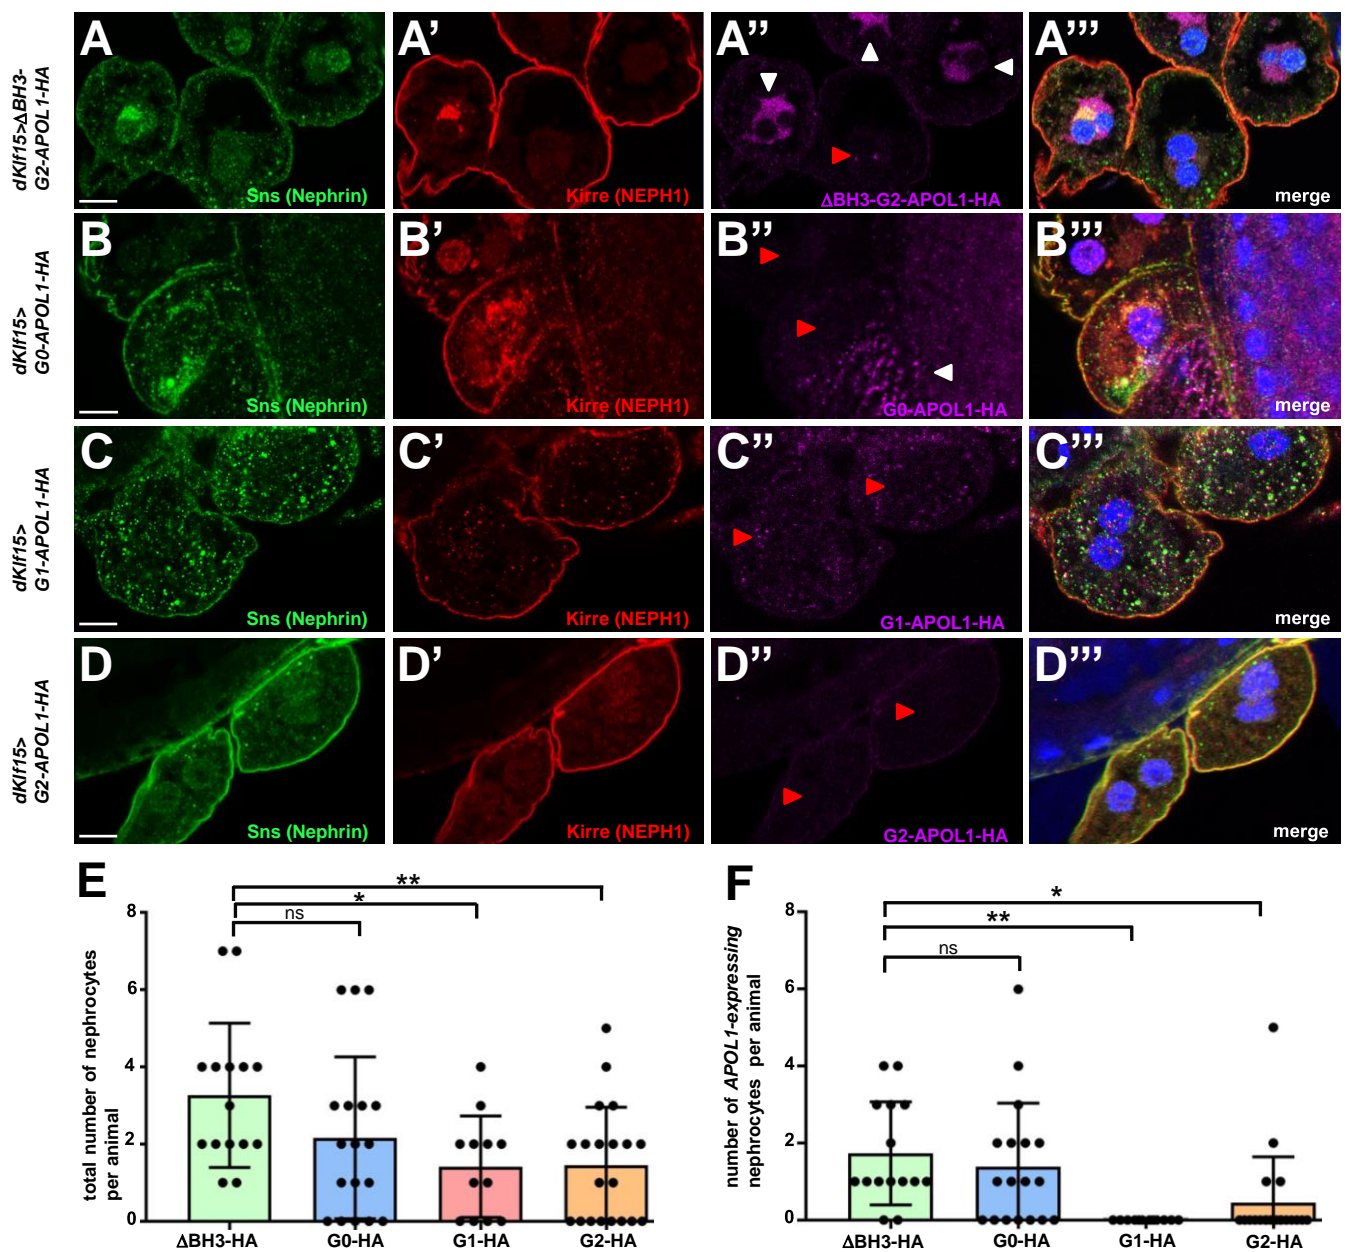

**Supplemental Figure 2: Expression of *APOL1* variants via *dKif15-GAL4* in adult nephrocytes.**

(A-E) Adult garland cell nephrocytes dissected from animals within one day after eclosion are shown for the indicated genotypes. The slit diaphragm proteins Sns (nephrin) and Kirre (NEPH1) are stained together with anti-HA in far red (magenta). Most nephrocytes in animals expressing the control transgene  $\Delta$ BH3-G2-APOL1 under *dKif15-GAL4* show transgene expression indicated by HA-staining (white arrow heads, A-A''). Only few and singular cells appear to downregulate most of the transgene expression (red arrow head). In nephrocytes expressing *G0-APOL1* much more non-expressing cells become detectable (read arrow heads), while few cells with lower expression are observed (white arrow head B-B''). Virtually no transgene expression is observed in nephrocytes when *G1-APOL1* (read arrow heads, C-C'') and *G2-APOL1* (red arrow heads, D-D'') are under control of *dKif15-GAL4*. All flies were raised at 29°C. Scale bars represent 10  $\mu$ m.

(E) Quantitation of data in (A-D) for the total number of nephrocytes per adult animal is shown (n= 12-20 animals per genotype).  $P > 0.05$  for *G0-APOL1*,  $P < 0.05$  for *G1-APOL1*, and  $P < 0.01$  for *G2-APOL1* compared to the control transgene  $\Delta$ BH3-G2-APOL1.

(F) Quantitation of data in (A-D'') for the number of nephrocytes that exhibit transgene expression (HA-positivity) per adult animal is shown (n= 12-20 animals per genotype).  $P > 0.05$  for *G0-APOL1*,  $P < 0.01$  for *G1-APOL1*, and  $P < 0.05$  for *G2-APOL1* comparing to the control transgene  $\Delta$ BH3-G2-APOL1.

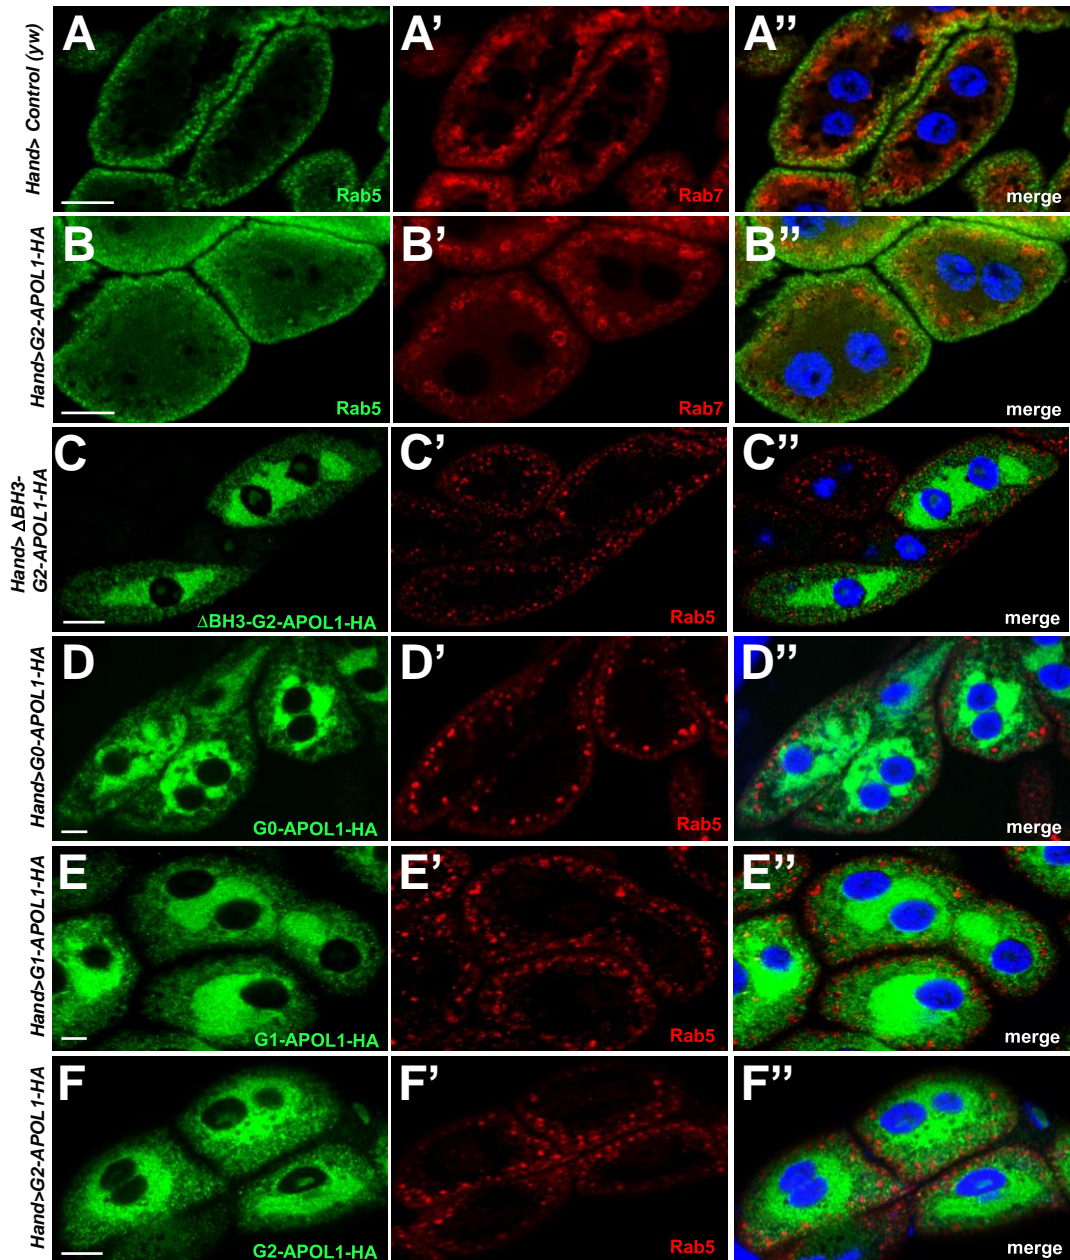

**Supplemental Figure 3: Expression of G2-APOL1 does not affect early/late endosomes and APOL1 transgenes do not overlap with Rab5.**

(A-B'') Control garland cell nephrocytes (A-A'') stained for early endosomal marker Rab5 (green) and late endosomal marker Rab7 (red) show the typical distribution in two concentric rings with early endosomes closer to the cell surface. Nephrocytes expressing G2-APOL1 show a regular staining pattern for endosomal markers Rab5 and Rab7 (B-B''). All flies are raised at 29°C. Scale bar represents 10  $\mu$ m and nuclei are marked by Hoechst 33342 in blue here and throughout the figure.

(C-F'') Garland cell nephrocytes stained for the respective APOL1 transgenes (HA-staining in green) and Rab5 (red) do not indicate any overlap for expression of  $\Delta$ BH3-G0-APOL1 (C-C''), G0-APOL1 (D-D''), G1-APOL1 (E-E'') and G2-APOL1 (F-F'') with the early endosomal marker protein.

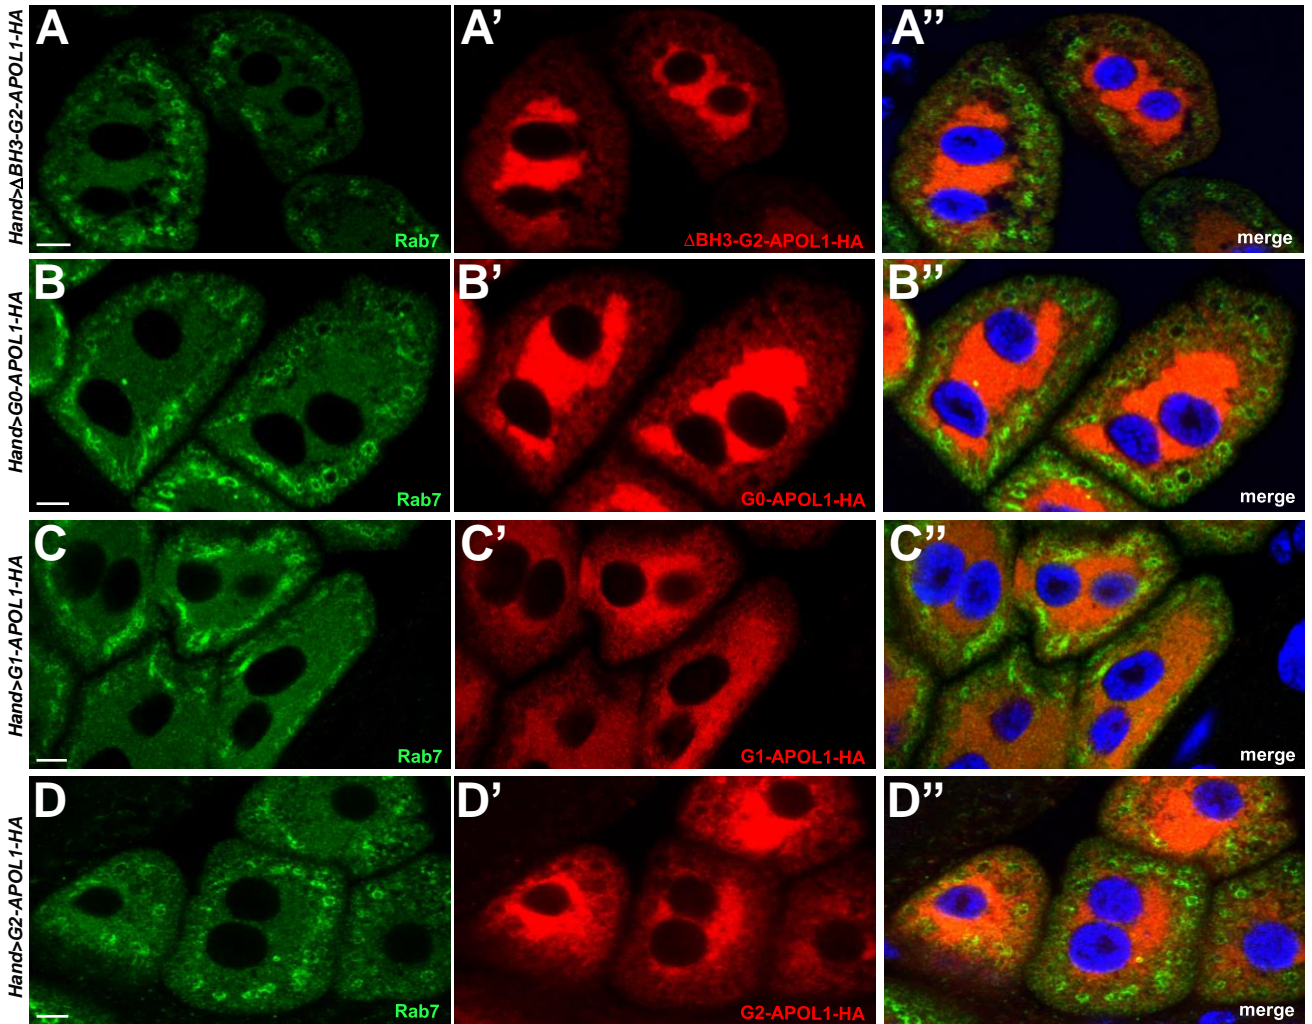

**Supplemental Figure 4: APOL1 variants do not localize to late endosomes.**

(A-D'') Garland cell nephrocytes stained for the respective *APOL1* transgene (HA-staining in red) and Rab7 (green) do not indicate any overlap for expression of  $\Delta$ BH3-G2-*APOL1* (A-A''), G0-*APOL1* (B-B''), G1-*APOL1* (C-C''), and G2-*APOL1* (D-D'') with the late endosomal marker protein. All flies are raised at 29 °C. Scale bar represents 10  $\mu$ m and nuclei are marked by Hoechst 33342 in blue here and throughout the figure.

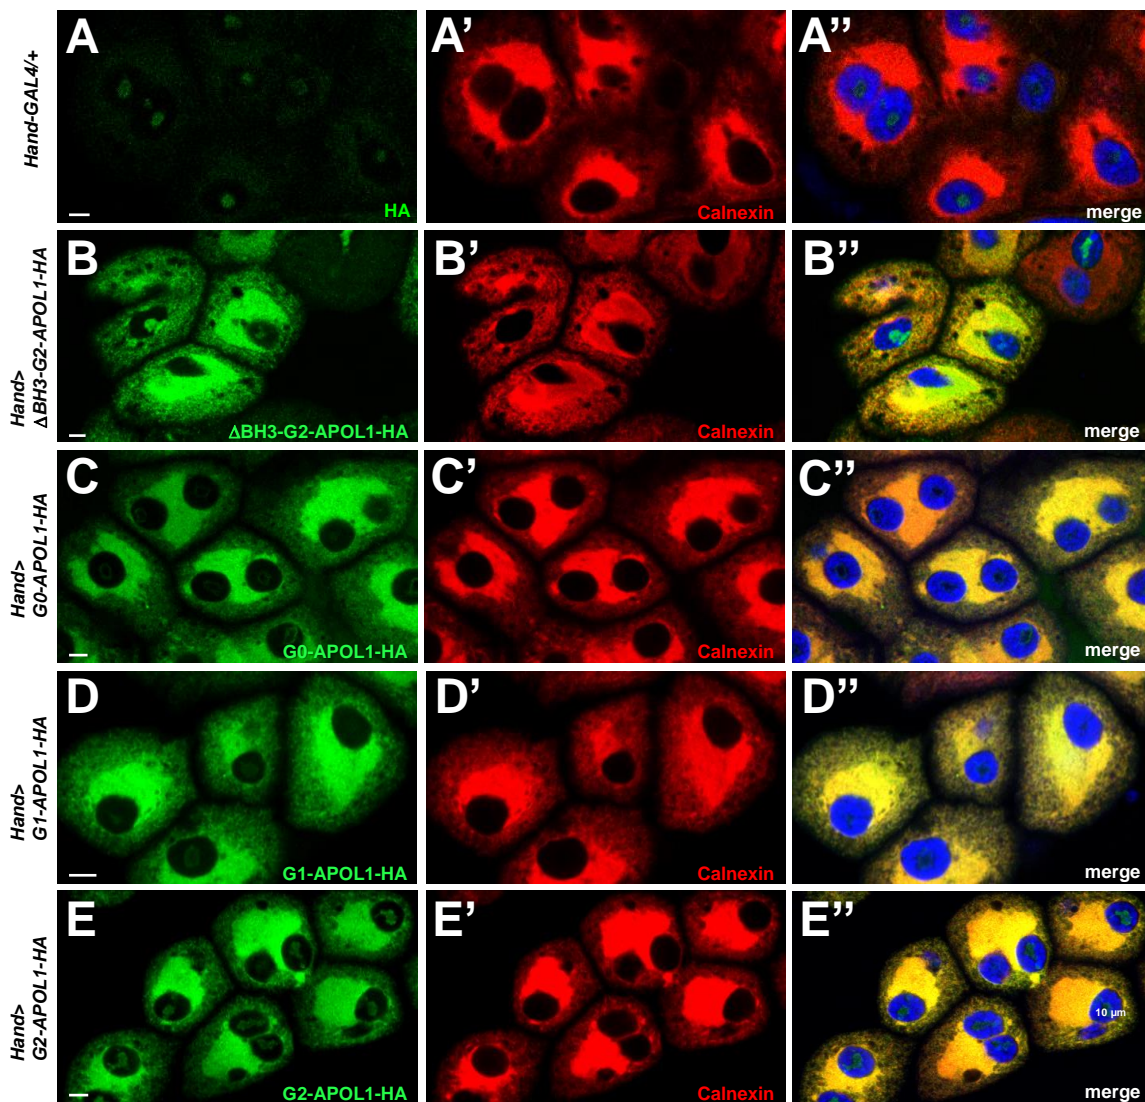

**Supplemental Figure 5: *APOL1* risk variants localize in the endoplasmic reticulum in *Drosophila* nephrocytes.**

(A-A'') Confocal microscopy images showing equatorial cross sections of control garland cell nephrocytes that lack *APOL1* transgene expression are shown. HA staining reveals a faint unspecific signal in an intra-nuclear position, while ER marker calnexin shows the typical ER pattern in a compact perinuclear signal. All animals were raised at 29 °C. Scale bar represents 10  $\mu$ m and nuclei are marked by Hoechst 33342 in blue here and throughout the figure.

(B-E'') Shown are equatorial cross sections of garland cell nephrocytes expressing various *APOL1* transgenes under control of *Hand-GAL4*. Cells are co-stained for HA to visualize the tagged transgenes and the ER marker calnexin. Now that HA-tagged transgenes are expressed, the much stronger HA-specific signal becomes detectable. Confocal settings are identical to (A). All transgenes show complete co-localization with the ER marker which includes  $\Delta$ BH3-G2-*APOL1* (B-B''), G0-*APOL1* (C-C''), G1-*APOL1* (D-D''), and G2-*APOL1* (E-E''). Thus, the *APOL1* variants studied here all seem to reside in the ER.

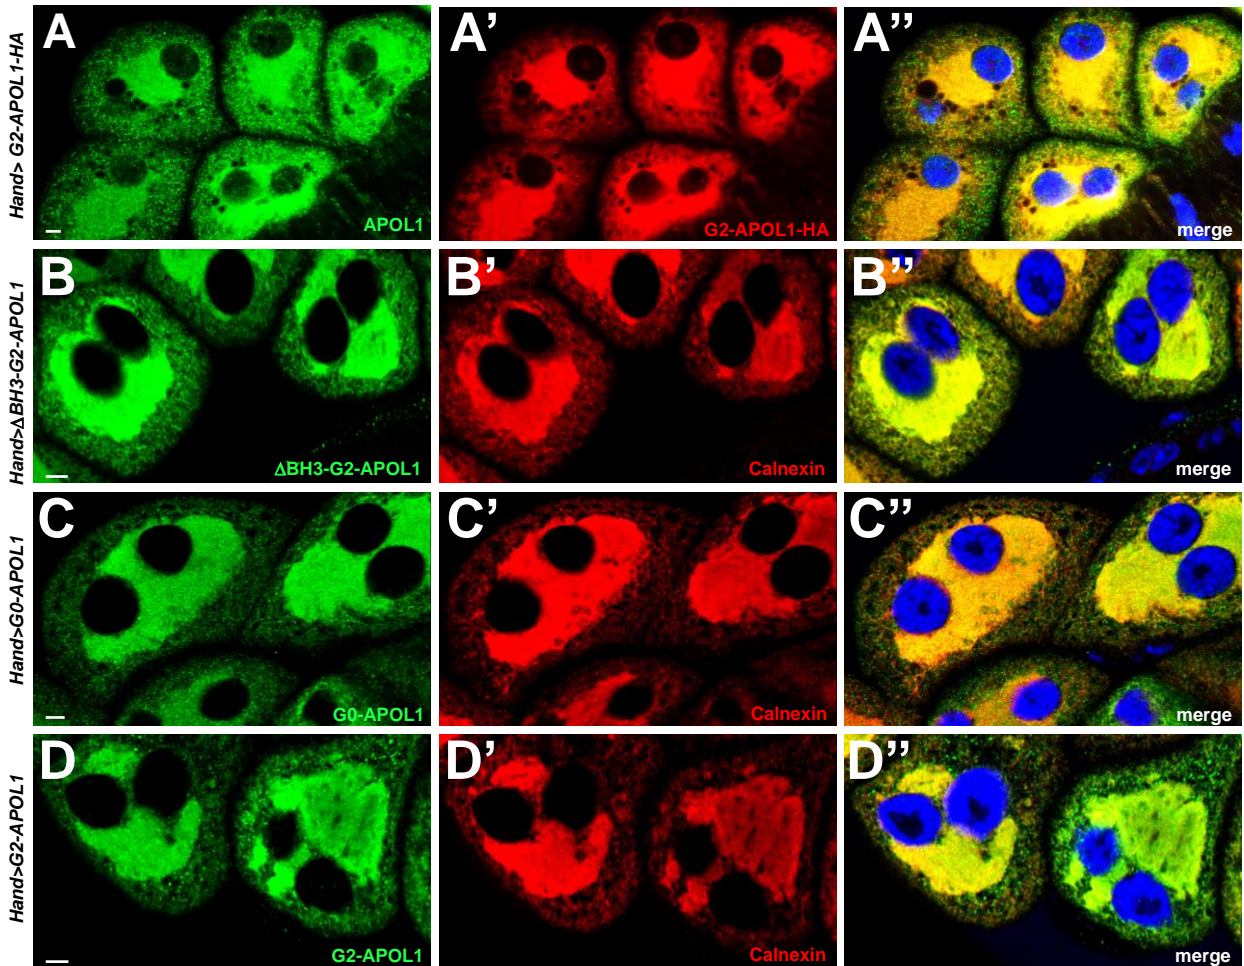

**Supplemental Figure 6: Untagged  $\Delta$ BH3-APOL1, G0-APOL1 and G2-APOL1 colocalize with the ER marker calnexin.**

**(A-A'')** G2-APOL1 expressing garland cell nephrocytes co-stained for human APOL1 protein (anti-APOL1 in green) and for the protein tag (HA-staining in red) confirm that tag and APOL1 staining render identical results. This excludes extensive cleavage of the c-terminal HA tag. All flies are raised at 29°C.

**(B-B'')**  $\Delta$ BH3-G2-APOL1 expressing garland cell nephrocytes co-stained for APOL1 (anti-APOL1 in green) and calnexin (in red) reveal complete co-localization of the transgene without tag with the ER marker.

**(C-D'')** G0-APOL1 (C-C'') and G2-APOL1 (D-D'') expressing garland cell nephrocytes co-stained for human APOL1 protein and the ER marker calnexin show colocalization for the no tag transgenes as well. Scale bar represents 10  $\mu$ m and nuclei are marked by Hoechst 33342 in blue here and throughout the figure.

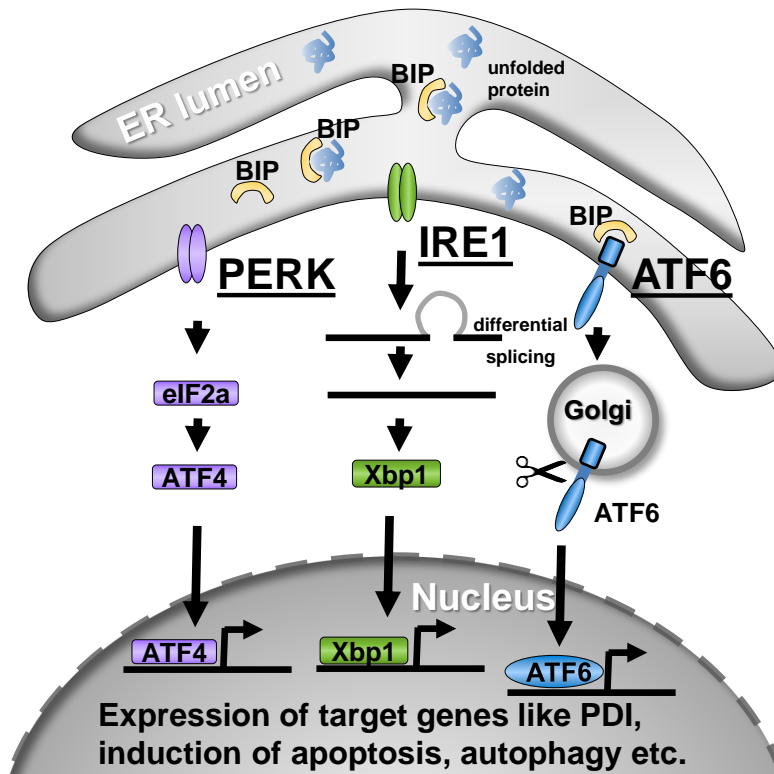

**Supplemental Figure 7: Overview ER stress signaling.**

Schematic showing a simplified overview of ER stress signaling. Bip protein is buffered by unfolded protein resulting in Bip-dissociation. Loss of Bip activates three independent sensor proteins (PERK, IRE1 and ATF6) that initiate downstream signaling.



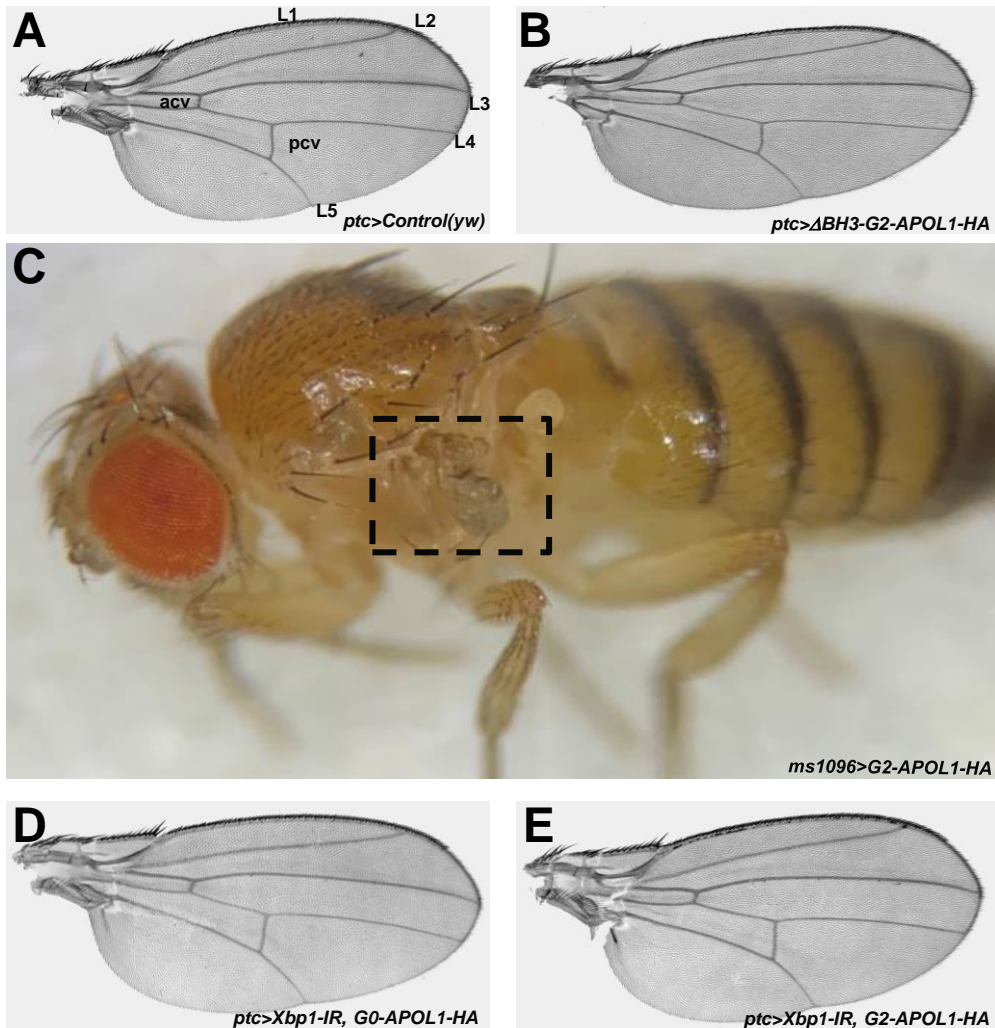

**Supplemental Figure 8: Adult wing phenotypes upon expression of APOL1 variants.**

**(A)** Control wings show regularly formed *Drosophila* wings. Five longitudinal veins (L1-L5) and the anterior cross vein (acv) and posterior cross veins (pcv) are indicated.

**(B)** Expression of G0-APOL1, G1-APOL1 and G2-APOL1 by *ptc*-GAL4 does not render adult offspring (not shown). In contrast, expression of  $\Delta$ BH3-G2-APOL1 by *ptc*-GAL4 gives rise to adults that form normal wings (compare wing in (B) to wing in (A)). Flies are raised at 18°C.

**(C)** Expression of G2-APOL1 with 1096-GAL4 results in adult animals that lack wings. Box highlights residual wing tissue. All flies are raised at 25°C.

**(D-E)** Attenuation of ER stress signaling by concomitant expression of *Xbp1*-RNAi using *ptc*-GAL4 abolished lethality for expression of G0-APOL1 (D) and G2-APOL1 (E) with formation of phenotypically normal wings. *Ptc*>*Xbp1*-RNAi, G1-APOL1 flies also developed phenotypically normal wings (data not shown). All flies are raised at 25°C.

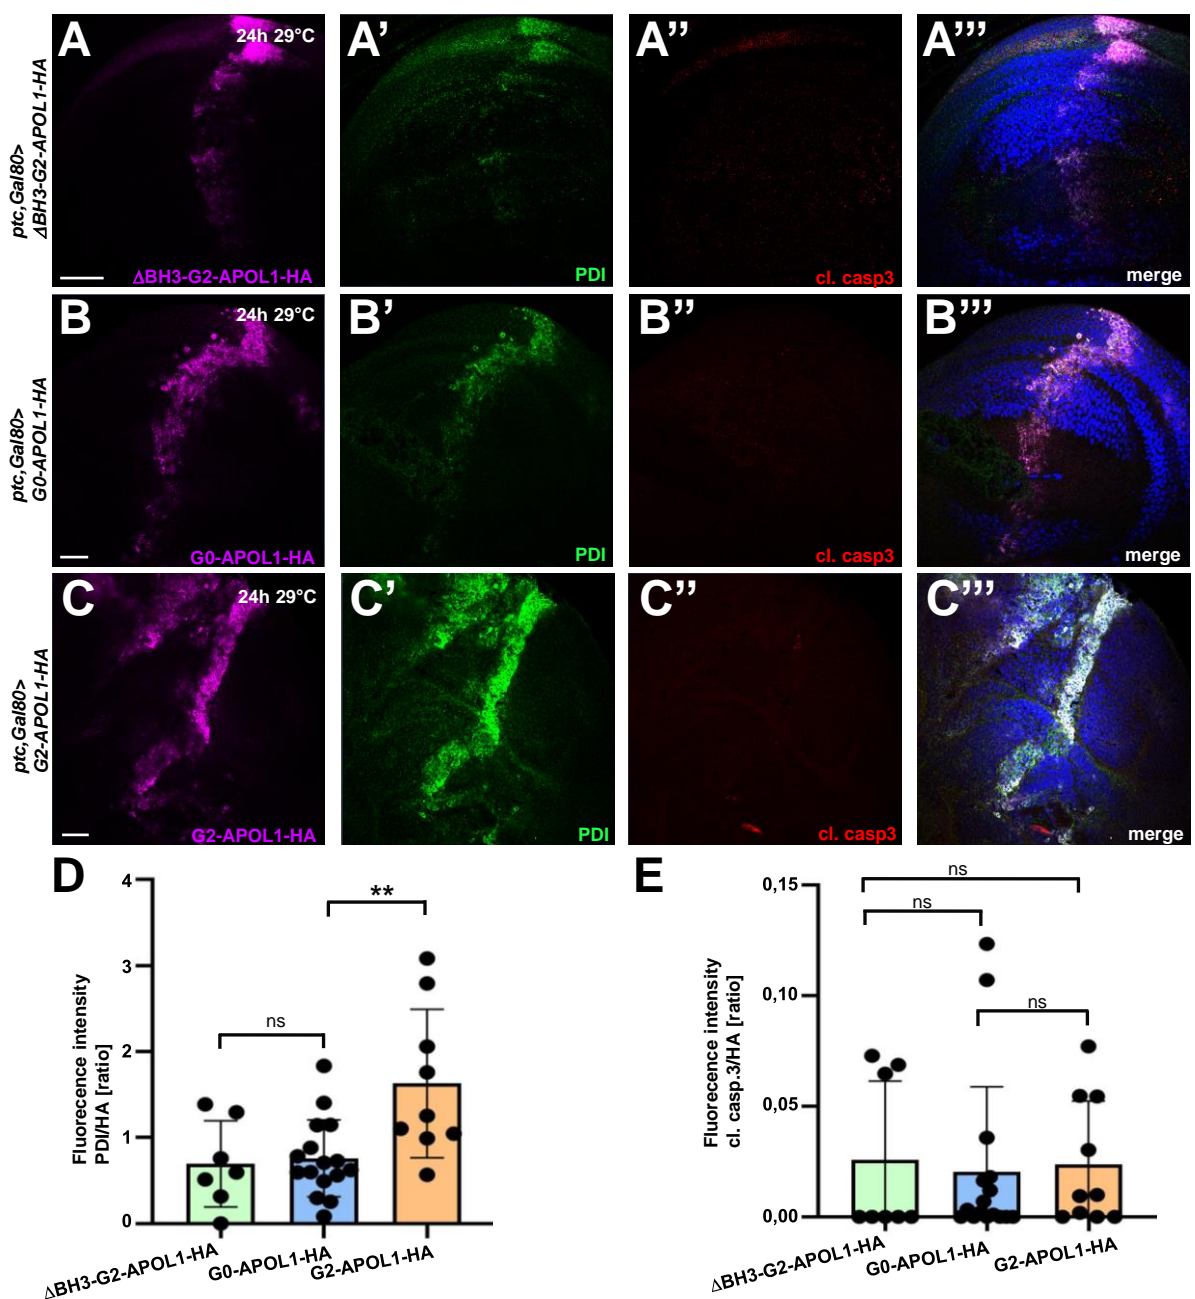

### Supplemental Figure 9: G2-APOL1-dependent ER stress precedes apoptosis.

(A-C''') Shown are wing discs expressing indicated *APOL1* transgenes with *ptc-GAL4* for 24 h following disinhibition of *GAL80<sup>ts</sup>* through temperature shift to 29°C. Short-term expression of  $\Delta$ BH3-G2-*APOL1* (A-A''') and G0-*APOL1* (B-B''') are accompanied by a mild and insignificant upregulation of PDI without detection of cleaved caspase-3. The short-term expression of G2-*APOL1* (C-C''') entails much stronger induction of ER stress as indicated by PDI expression levels, but also without induction of apoptosis. This indicates that ER stress induction specifically by the risk variant occurs before appearance of apoptotic cells. Scale bar represents 50  $\mu$ m and nuclei are marked by Hoechst 33342 in blue here and throughout the figure.

(D) Quantitation of data in (A-C''') for fluorescence intensity of PDI staining in ratio to the expression strength indicated by the HA signal ( $n=7-17$  per genotype,  $P>0.05$  for G0-*APOL1*, and  $P<0.01$  for G2-*APOL1*).

(E) Quantitation of data in (A-C''') for fluorescence intensity of cleaved caspase-3 staining in ratio to the expression strength indicated by the HA signal shows no apoptosis induction for either genotype in this setting ( $n=8-16$ ,  $P>0.05$  for G0-*APOL1*, and  $P>0.05$  for G2-*APOL1*).

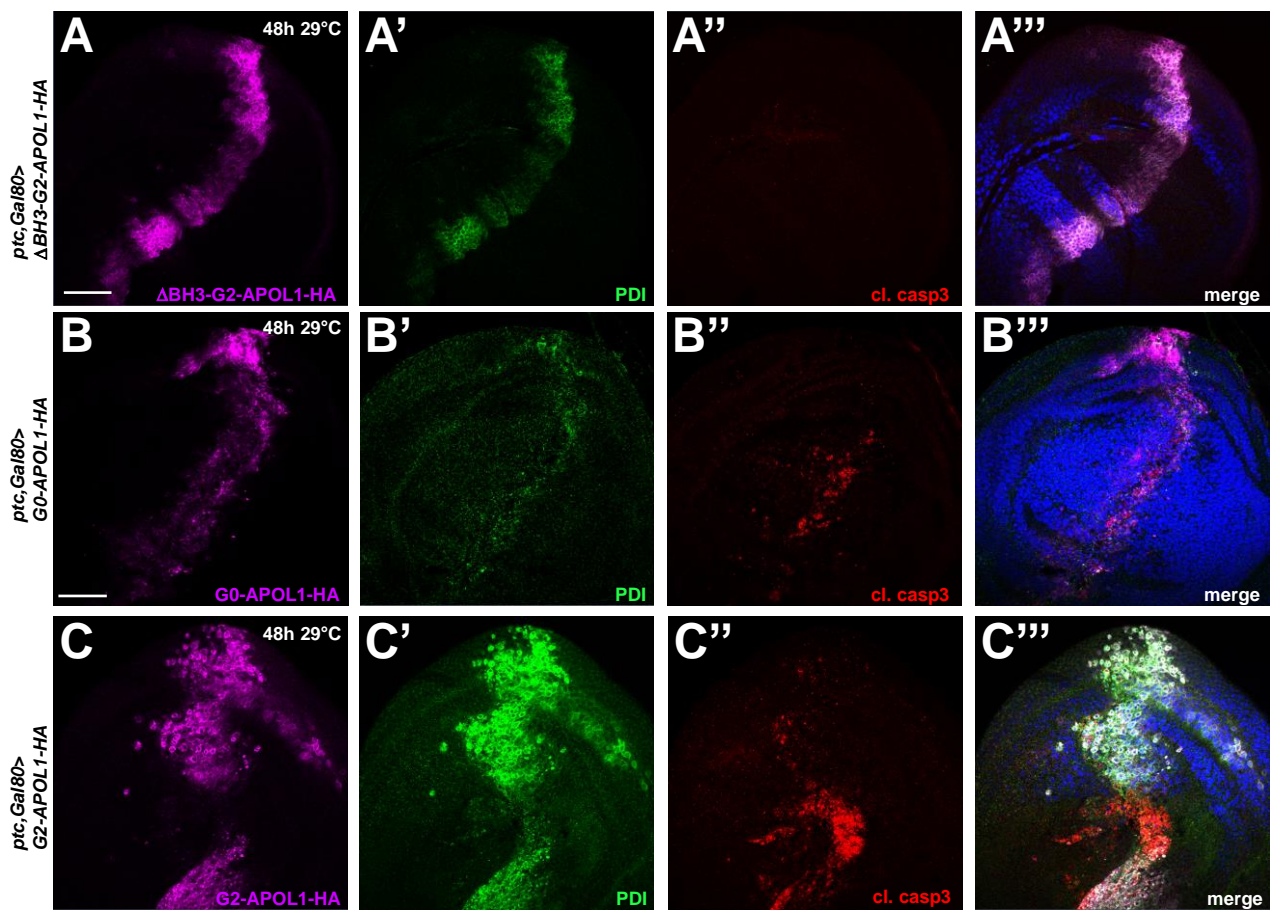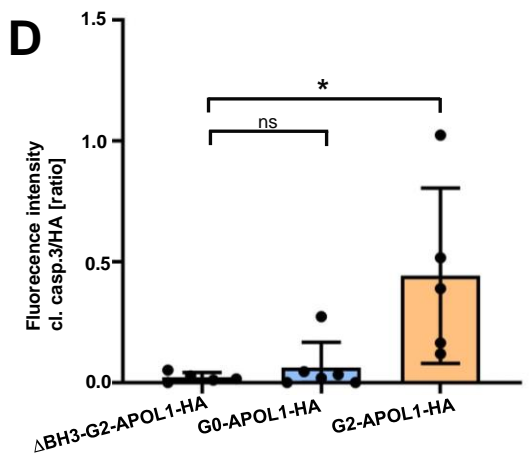

### Supplemental Figure 10: G2-APOL1 induces apoptosis after expression for 48 h.

(A-C''') Shown are wing discs expressing *APOL1* transgenes with *ptc-GAL4* for 48 h following disinhibition of *GAL80<sup>ts</sup>* through temperature shift to 29°C. The prolonged expression of G2-*APOL1* (C-C''') entails much stronger induction of ER stress as indicated by PDI expression levels than control variant  $\Delta$ BH3-G2-*APOL1* (A-A''') and the wild type G0-*APOL1* (B-B'''). Wing cells that stain cleaved caspase-3 are detected for G2-*APOL1* (C'') but not  $\Delta$ BH3-G2-*APOL1* (A'') and G0-*APOL1* (B''). This indicates that intense ER stress induction for 48 h is sufficient to trigger cell death. Scale bar represents 50  $\mu$ m and nuclei are marked by Hoechst 33342 in blue here and throughout the figure.

(D) Quantitation of data in (A-C''') for fluorescence intensity of cleaved caspase-3 staining in ratio to the expression strength indicated by the HA signal shows significant apoptosis induction for G2-*APOL1* in this setting (n=5-6, P>0.05 for G0-*APOL1*, and P<0.05 for G2-*APOL1*).

| flystocks                | obtained from                                   | used                                               |
|--------------------------|-------------------------------------------------|----------------------------------------------------|
| <i>Xbp1</i> -RNAi        | Bloomington Drosophila Stock Center BDSC #36755 | expresses dsRNA for RNAi of <i>Xbp1</i>            |
| <i>bip</i> -RNAi         | Vienna Drosophila RNAi Center VDRC #14882       | expresses dsRNA for RNAi of <i>bip</i>             |
| <i>EGFP</i> -RNAi        | BDSC #41553                                     | as control RNAi                                    |
| <i>prospero</i> -GAL4    | gift from Chris Doe                             | to control expression in garland cell nephrocytes  |
| <i>Hand</i> -GAL4        | kindly provided by A. Paululat via H. Jasper    | to control expression in garland cell nephrocytes  |
| <i>dKIF15</i> -Gal4      | kindly provided by P. Hartley                   | to control expression in garland cell nephrocytes  |
| <i>ptc</i> -GAL4         | from N. Perrimon                                | for wing expression                                |
| <i>1096</i> -GAL4        | from G. Pyrowolakis                             | for wing expression                                |
| <i>Xbp1</i> -EGFP        | BDSC #39719                                     | as a reporter for <i>Xbp1</i> -dependent ER stress |
| <i>Gal80 on III</i>      | BDSC #7018                                      | express a transgene temperature-dependently        |
| <i>yellow white (yw)</i> | from M. Köttgen                                 | as wildtype control                                |

**Supplemental Table 1: Fly stocks.**

| Construct                        | direction | Primer sequence                                                                             |
|----------------------------------|-----------|---------------------------------------------------------------------------------------------|
| G0-APOL1-HA                      | forward   | 5'-GGGGACAAGTTTGTACAAAAAAGCAGGCTTACCatggaggagctgctttgct                                     |
|                                  | reverse   | 5'-GGGGACCACCTTTGTACAAGAAAGCTGGGTCCTATGCATAGTCCGGGACGTCATAGGGATAGAAGCCTGCcagttcttggtccgctgc |
| G1-APOL1-HA                      | forward   | 5'-CTCAACAATAATTATAAGATTCTGCAG                                                              |
|                                  | reverse   | 5'-TACAGGGGCCACATCCGTGA                                                                     |
|                                  | forward   | 5'-TCACGGATGTGGCCCTGTAGGCTTCTTTCTTGTGCTGGATGTAG                                             |
|                                  | reverse   | 5'-CTGCAGAACTTTATAATTATTGTTGAGCATGTTTAGCTTCTCCTCCAGC                                        |
| G2-APOL1-HA                      | forward   | 5'-AGCTAAACATTCTCAACAATAAGATTCTGCAGGCGGAC                                                   |
|                                  | reverse   | 5'-GTCCGCCTGCAGAATCTTATTGTTGAGAATGTTTAGCT                                                   |
| $\Delta$ BH3-G2-APOL1-HA         | forward   | 5'-GTAAGCTTGAGGATAACATAAGAAGGAAGGTCCACAAAGGCACCAC                                           |
|                                  | reverse   | 5'-GTGGTGCCTTTGTGGACCTTCCTTCTTATGTTATCCTCAAGCTTAC                                           |
| G0/G2/ $\Delta$ BH3-APOL1 no tag | forward   | 5'-GTACAAAAAAGCAGGCTTACC                                                                    |
|                                  | reverse   | 5'-CTTTGTACAAGAAAGCTGGGTCCTACAGTTCTTGGTCCGCCTGC                                             |

**Supplemental Table 2: Primer sequences.**

| primary antibodies            | obtained                        | 1 <sup>st</sup> Antibody dilution rate |
|-------------------------------|---------------------------------|----------------------------------------|
| rabbit anti-sns               | gift from S. Abmayr             | 1:200                                  |
| guinea pig anti-Kirre         | gift from S. Abmayr             | 1:200                                  |
| rat anti-HA                   | 1186742300, Merck/Roche         | IF: 1:200; WB: 1:500                   |
| rabbit anti-Rab5              | ab18211, abcam                  | 1:200                                  |
| rabbit anti-APOL1             | HPA018885, Sigma                | 1:200                                  |
| rabbit anti-cleaved caspase-3 | 9661, Cell Signaling Technology | 1:200                                  |
| mouse anti-Rab7               | Rab7, DSHB                      | 1:200                                  |
| mouse anti-calnexin           | Cnx99A 6-2-1, DSHB              | 1:200                                  |
| mouse anti-PDI                | ADI-SPA-891-D, Enzo             | 1:200                                  |
| mouse anti-beta-tubulin       | E7, DSHB                        | 1:500                                  |

**Supplemental Table 3: Antibodies.**
